# Supplementary material
Source: publisher figshare collection journal article supplement (https://karger.figshare.com/ndownloader/files/27788439)

## TRASGU 2- ONLINE ONLY SUPPLEMENTARY MATERIAL

**Annex Figure 1. Flow-chart**

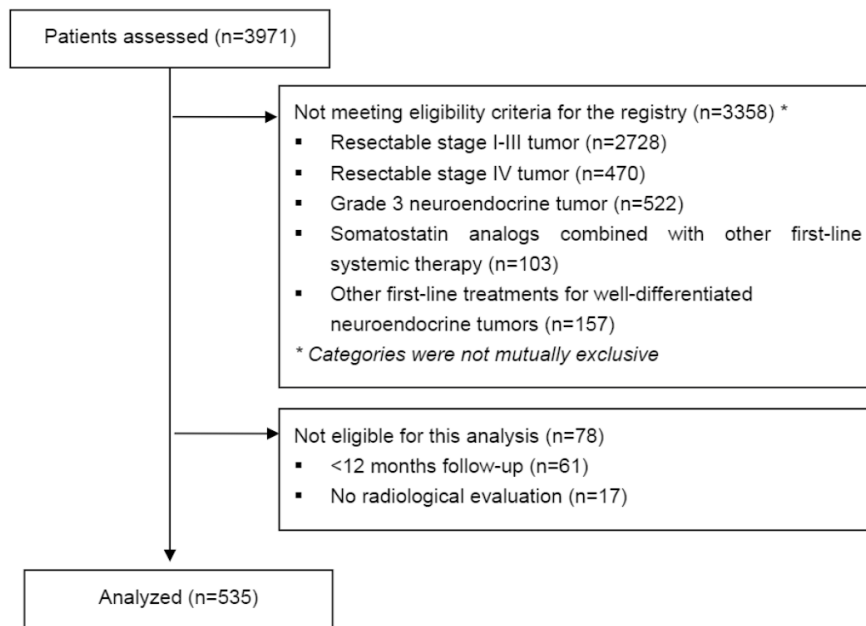

**Annex Figure 2.** Trace plots for MCMC samples, denoting adequate convergence (Rhat <1.1 for all parameters).

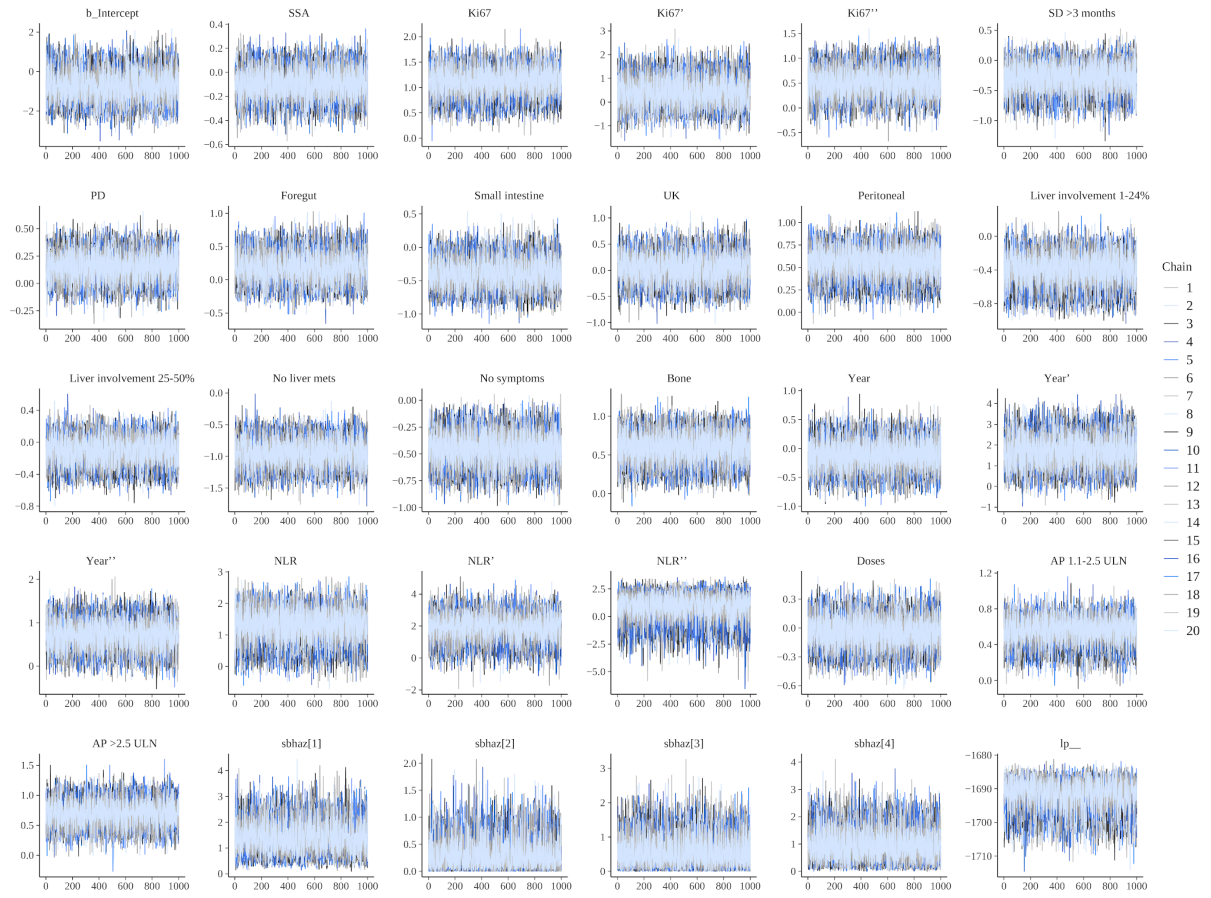

Supplement: Supplementary file 1 [file 27788439]
